# Supplementary material for: Ag(i) bipyridyl coordination polymers containing functional anions
Source: Royal Society of Chemistry journal article supplement (doi:10.1039/c6nj03555h), 2017-01-01
Supplement: c6nj03555h1.pdf [file c6nj03555h1.pdf]

**ESI for NEW JOURNAL OF CHEMISTRY**

**Ag(I) bipyridyl coordination polymers containing functional anions.**

**Christopher A. Dodds, Claire Hobday, Alan R. Kennedy,\* Scott C. McKellar, Katy Smillie & Aiden Walls.**

**WestCHEM Department of Pure & Applied Chemistry,  
University of Strathclyde,  
295 Cathedral Street,  
Glasgow G1 1XL.**

**Displacement ellipsoid figures showing the asymmetric unit contents and the primary coordination sphere of the metals.**

All figures were drawn with MERCURY using the options ORTEP and 50% probability ellipsoids. H atoms are drawn as small spheres of arbitrary size.

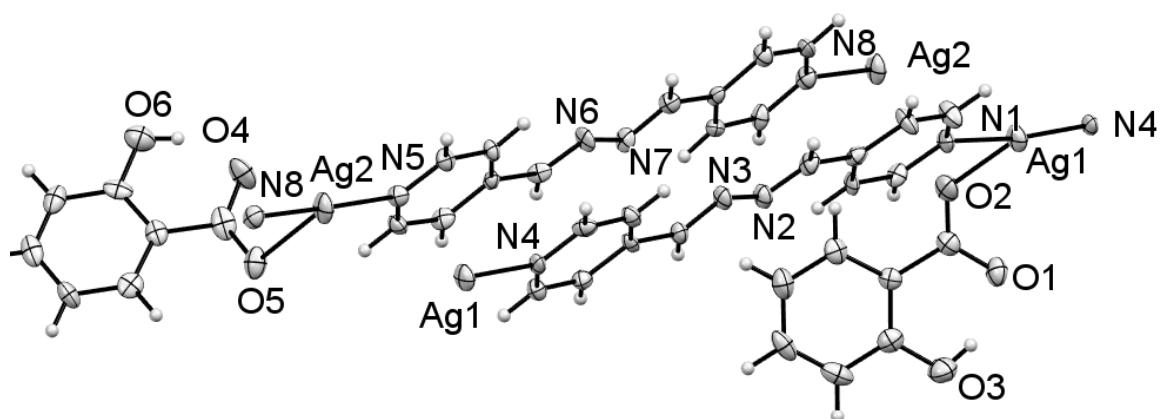

Supplementary Figure 1. [AgL1][salicylate],  $Z' = 2$ .

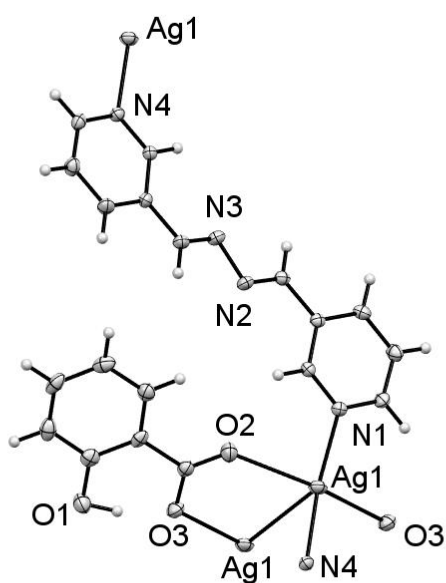

Supplementary Figure 2. [AgL2][salicylate].

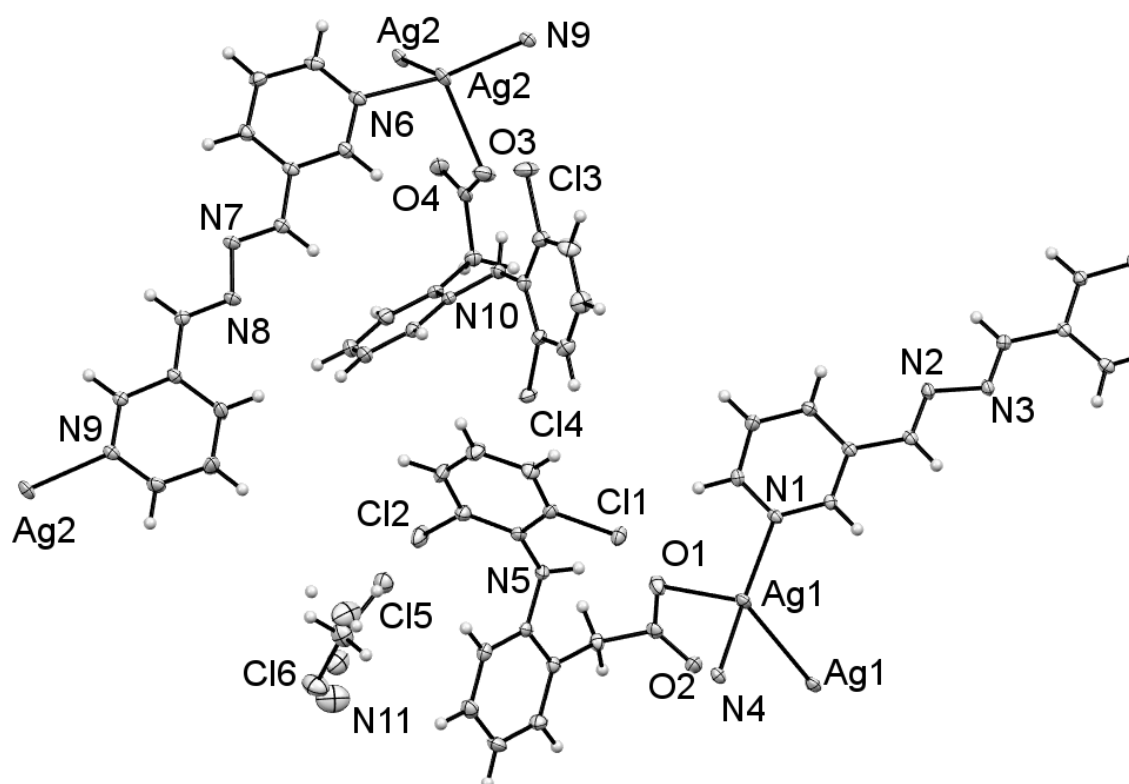

Supplementary Figure 3. [AgL2][diclofenac].  $Z' = 2$ . The solvent site is a disordered mix of MeCN and CH<sub>2</sub>Cl<sub>2</sub>.

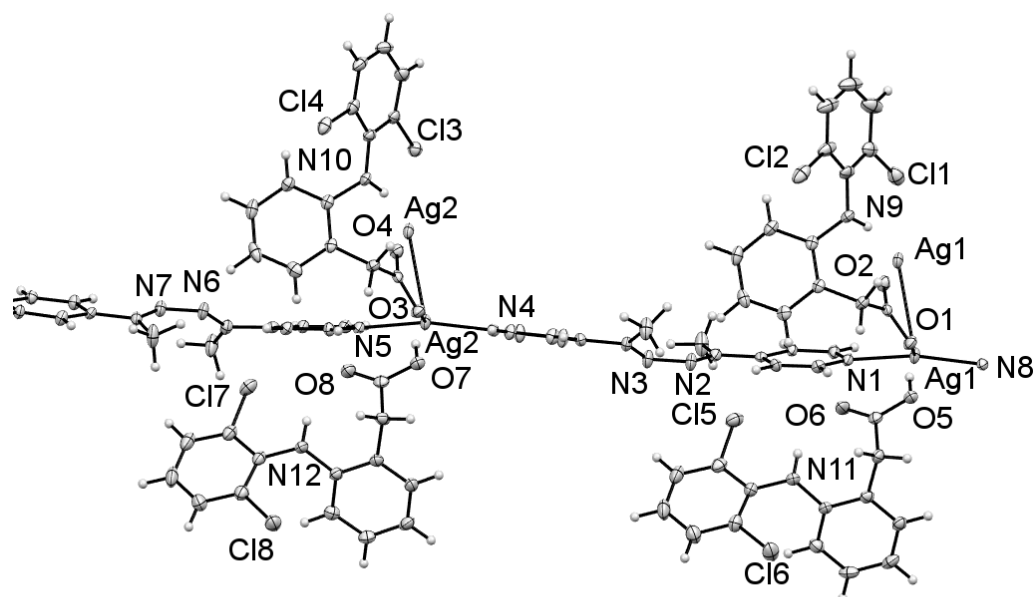

Supplementary Figure 4. [AgL3][diclofenac].  $Z' = 2$ .

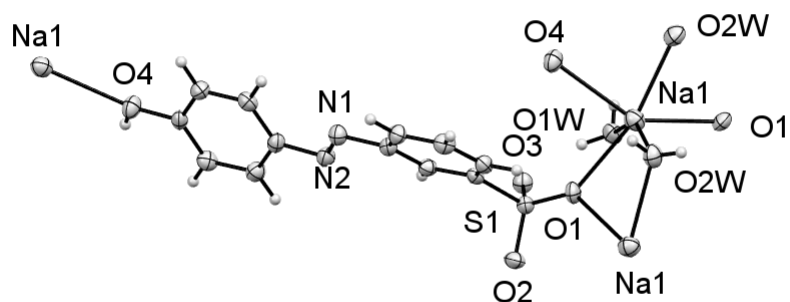

Supplementary Figure 5. [Na][DyeB] hydrate.

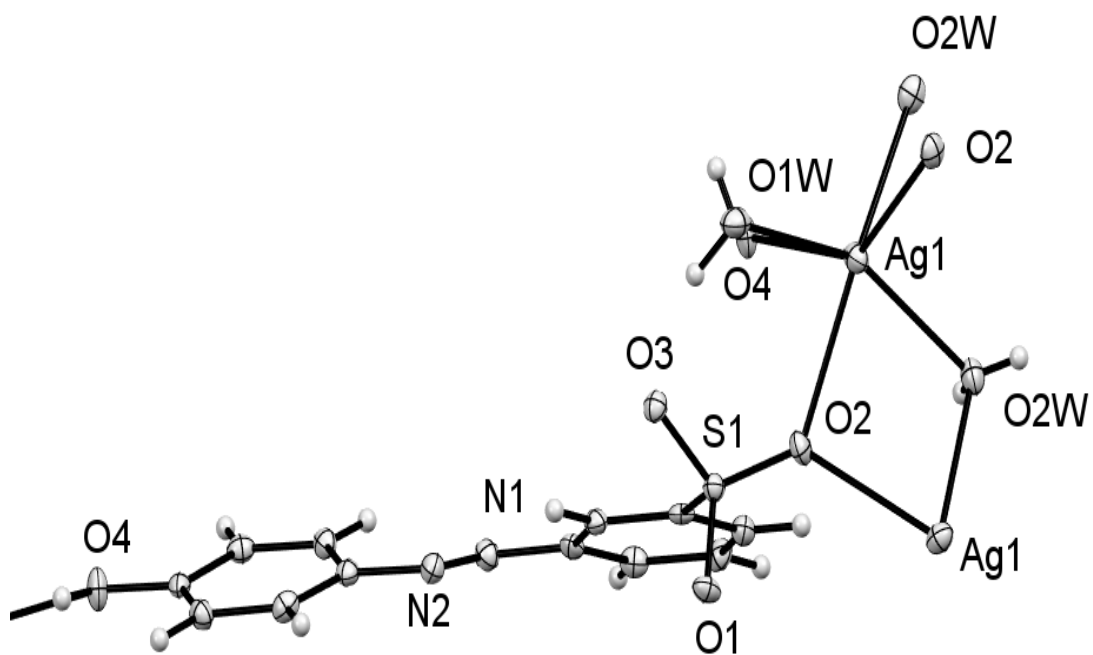

Supplementary Figure 6. [Ag/Na][DyeB] hydrate. For simplicity, the figure has the atom site labelled as Ag1 – but this site was found to be a 87:13 mix of Ag and Na.

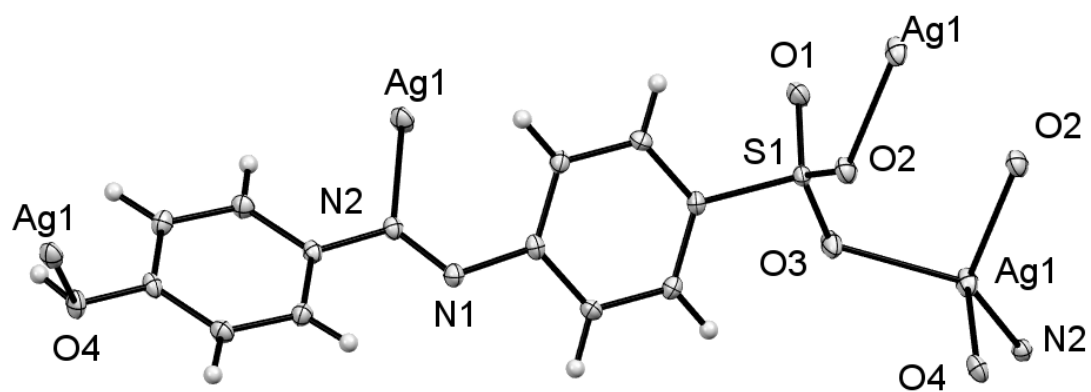

Supplementary Figure 7. [Ag][DyeC] hydrate.

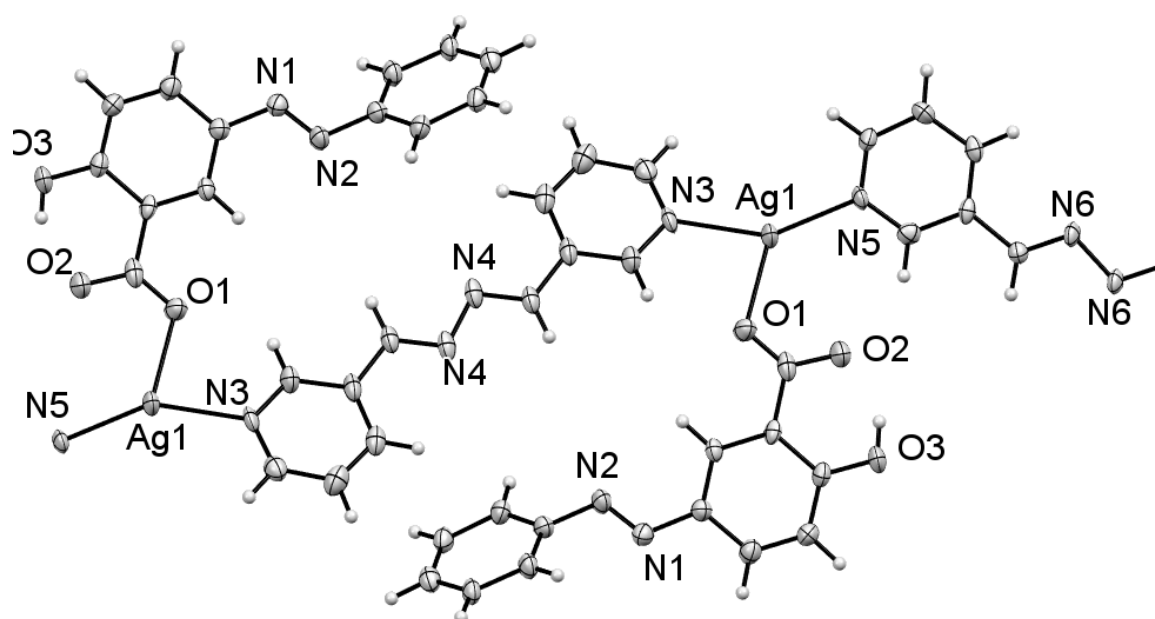

Supplementary Figure 8. [AgL2][DyeA],  $Z' = 2$ .

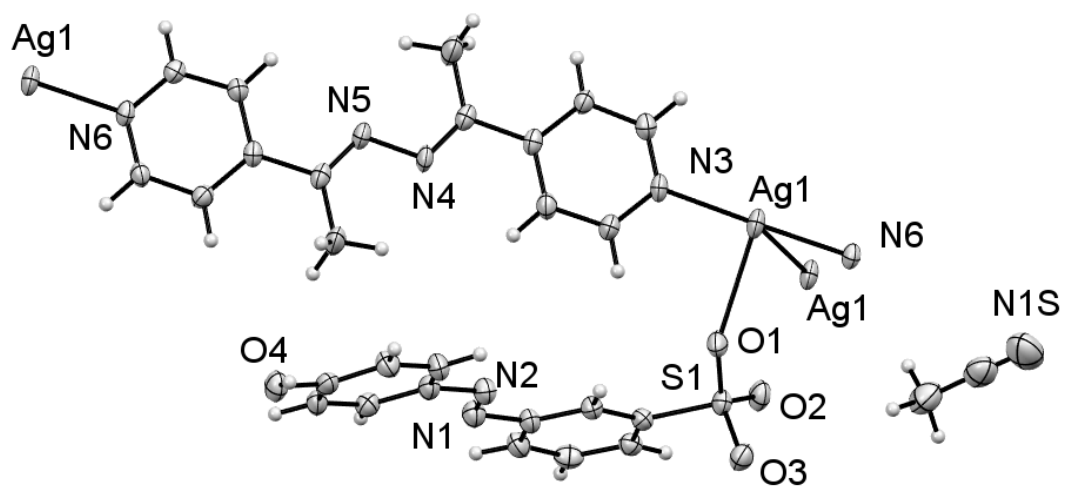

Supplementary Figure 9. [AgL3][DyeB].

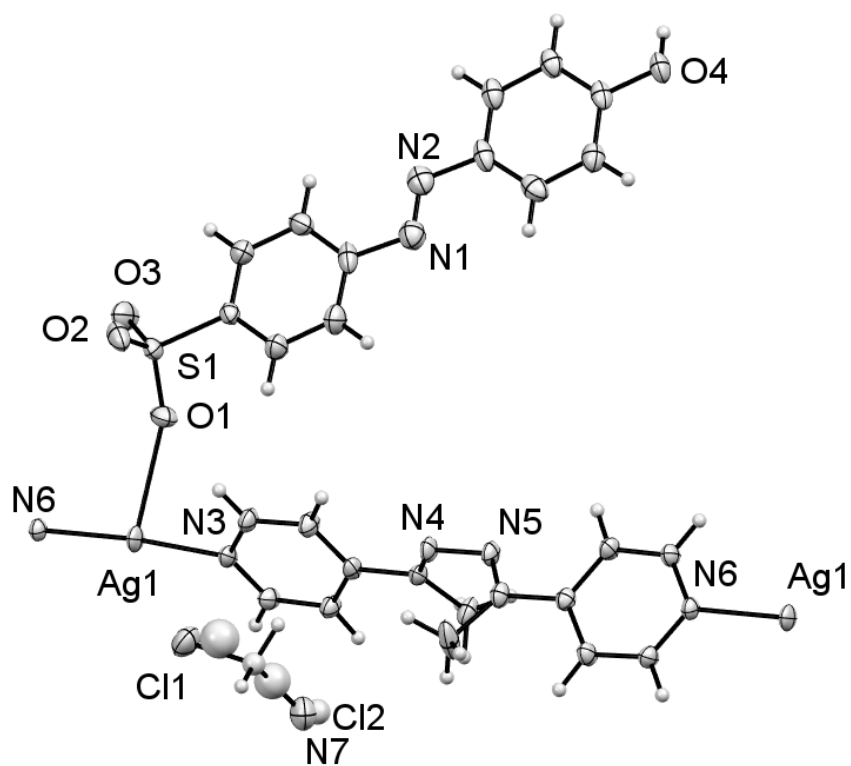

Supplementary Figure 10. [AgL3][DyeC]. The solvent site is a mix of MeCN and CH<sub>2</sub>Cl<sub>2</sub>.
